# Supplementary material
Source: Springer Nature journal article supplement (https://www.springermedizin.de/resource/supplementary/12913_2014_3547_MOESM1_ESM.pdf/9533216)
Supplement: MOESM1 [file 9533216]

### Silent generation

- Time to record or think about as many ideas as possible, in silence, in response to the question.

### Round robin

- Each participant presents one idea at a time and ideas are recorded for everyone to see; this continues until there are no more new ideas.

### Clarification

- Opportunity to clarify or elaborate on ideas.
- Recorded items are checked for duplication and possible grouping.

### Ranking and discussion

- Participants select and rank their top five preferences
- Total scores presented and discussed.
